1 **Title: First-in-human trial evaluating safety and pharmacokinetics of AT-752, a novel**  
2 **nucleotide prodrug with pan-serotype activity against dengue virus**

3

4 Authors:

5 Xiao-Jian Zhou,<sup>a,#</sup> Jason Lickliter,<sup>b</sup> Maureen Montrond,<sup>a</sup> Laura Ishak,<sup>a</sup> Keith Pietropaolo,<sup>a</sup>

6 Dayle James,<sup>a</sup> Bruce Belanger,<sup>a</sup> Arantxa Horga,<sup>a</sup> Janet Hammond<sup>a</sup>

7

8 Affiliations:

9 <sup>a</sup>Atea Pharmaceuticals, Inc, Boston, Massachusetts, USA

10 <sup>b</sup>Nucleus Network, Melbourne, Australia

11

12 Running Head: First-in-human, dose-escalation study of AT-752 [54 characters and spaces]

13

14 <sup>#</sup>Address correspondence to Xiao-Jian Zhou, [zhou.xj@ateapharma.com](mailto:zhou.xj@ateapharma.com)

15 **ABSTRACT**

16 AT-752 is a novel guanosine nucleotide prodrug inhibitor of the dengue virus (DENV)  
17 polymerase with sub-micromolar, pan-serotype antiviral activity. This Phase 1, double-blind,  
18 placebo-controlled, first-in-human study evaluated the safety, tolerability, and  
19 pharmacokinetics of ascending single and multiple oral doses of AT-752 in healthy subjects.  
20 AT-752 was well tolerated when administered as a single dose up to 1500 mg, or when  
21 administered as multiple doses up to 750 mg three times daily (TID). No serious adverse  
22 events occurred, and the majority of treatment-emergent adverse events were mild in  
23 severity and resolved by the end of the study. In those receiving single ascending doses of  
24 AT-752, no pharmacokinetic ethnic sensitivity was observed in Asian subjects and no food  
25 effect was observed. Plasma exposure of the guanosine nucleoside metabolite AT-273, the  
26 surrogate of the active triphosphate metabolite of the drug, increased with increasing dose  
27 levels of AT-752 and exhibited a long half-life of approximately 15–25 h. Administration of  
28 AT-752 750 mg TID led to a rapid increase in plasma levels of AT-273 exceeding the target *in*  
29 *vitro* 90% effective concentration (EC<sub>90</sub>) of 0.64 μM in inhibiting DENV replication, and  
30 maintained this level over the treatment period. The favorable safety and pharmacokinetic  
31 results support evaluation of AT-752 as an antiviral for the treatment of dengue in future  
32 clinical studies.

### 33 INTRODUCTION

34 Dengue is a mosquito-borne illness caused by four serotypes of dengue virus (DENV1–4) (1).  
35 DENV belongs to the Flaviviridae family and is a single-stranded positive-sense RNA virus (1).  
36 Dengue virus-associated diseases are major causes of illness and death in the tropical and  
37 subtropical world, with an estimated 100–400 million people infected yearly  
38 (<https://www.who.int/news-room/fact-sheets/detail/dengue-and-severe-dengue>). The  
39 incidence of dengue has increased 30-fold globally over the past 50 years, with several  
40 recent outbreaks contributing to a sharp increase in the Americas of over 3 million new  
41 infections recorded in 2023 (2, 3) (<https://www.paho.org/en/news/3-8-2023-dengue-cases-increase-globally-vector-control-community-engagement-key-prevent-spread>). Despite its  
42 high prevalence, there are no direct-acting antivirals for dengue, and treatment options are  
43 primarily centered around supportive care (4-6). There are currently two licensed dengue  
44 vaccines available in certain countries: CYD-TDV (chimeric yellow fever-dengue-tetravalent  
45 dengue vaccine; Dengvaxia) is licensed in 20 countries and indicated for use in individuals  
46 aged 9–45 years depending on country, whereas TAK-003 (Qdenga) is available for children  
47 and adults in Europe, Indonesia, Thailand, and Brazil (7-9)  
48 (<https://www.takeda.com/newsroom/newsreleases/2023/Takeda-Dengue-Vaccine-Recommended-by-World-Health-Organization-Advisory-Group-for-Introduction-in-High-Dengue-Burden-and-Transmission-Areas-in-Children-Ages-Six-to-16-Years/>). Critically,  
49 however, both vaccines offer imbalanced protection across serotypes, and data indicate low  
50 efficacy in younger children (7, 9, 10). Consequently, there are several vaccines and  
51 antivirals in development, including repurposed drugs (5-7). To date, clinical trials of  
52 repurposed drugs with antiviral activity such as balapiravir, chloroquine, lovastatin, and  
53 celgosivir have not demonstrated significant efficacy in reducing viremia and/or improving

57 clinical outcomes (11-14). Thus, there remains an unmet need for an effective direct-acting  
58 antiviral for the treatment of dengue, especially considering that a higher viral burden has  
59 been linked to severe dengue disease (6, 15).  
60 AT-752 is an orally available novel guanosine nucleotide prodrug inhibitor of the DENV  
61 polymerase with sub-micromolar, pan-serotype antiviral activity (16). AT-752 is the  
62 hemisulfate salt of AT-281, a dual guanosine nucleotide prodrug which undergoes multistep  
63 metabolic activation to the active 5' triphosphate metabolite AT-9010, which selectively  
64 inhibits the viral RNA-dependent RNA polymerase (16, 17) (**Figure 1**). Dephosphorylation of  
65 AT-9010 results in the formation of the guanosine nucleoside metabolite AT-273, which is  
66 regarded as a surrogate plasma marker for intracellular concentrations of AT-9010 (18).

67 **Figure 1. Metabolic pathway of AT-752**

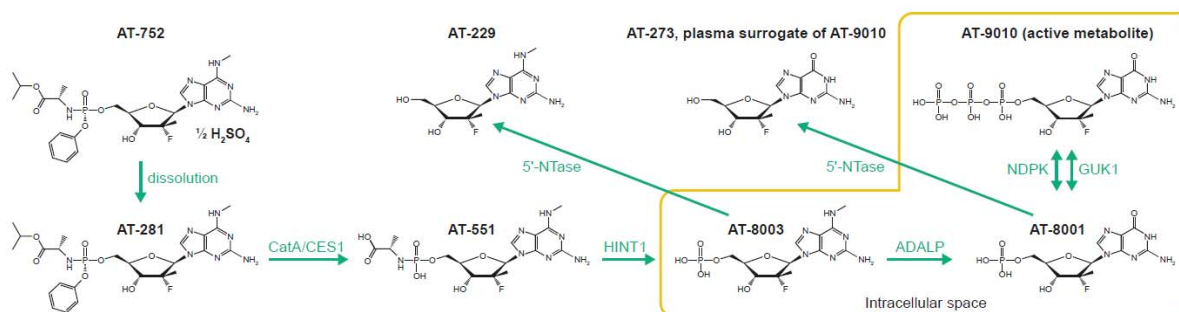

68  
69 5'-Ntase, 5'-nucleotidase; ADALP, adenosine deaminase-like protein; CatA, cathepsin A; CES1, carboxylesterase 1; GUK1,  
70 guanylate kinase; HINT1, histidine triad nucleotide binding protein 1; NDPK, nucleoside-diphosphate kinase.  
71 AT-752 is a potent inhibitor of DENV2 and DENV3, as well as other flaviviruses, *in vitro*, and  
72 demonstrated *in vivo* activity against DENV2 in a mouse model of disease (16). Based on  
73 initial pre-clinical toxicology studies of AT-752 in rats and monkeys, the no observed adverse  
74 effect level after 14 days of dosing was determined as 1000 mg/kg/day of AT-752 (expressed  
75 as AT-281 free base), providing at least 40-fold of margin of safety for the starting dose of  
76 250 mg in humans (Data on file, Atea Pharmaceuticals, Inc).

77 This first-in-human Phase 1 study was designed to evaluate the safety, tolerability, and  
78 pharmacokinetics (PK) of oral single ascending doses (SAD) and multiple ascending doses  
79 (MAD) of AT-752 (free base AT-281 and metabolites AT-551, AT-229, and AT-273) in healthy  
80 male and female subjects. Additionally, the effect of food on the PK of single oral doses of  
81 AT-752, and PK ethnic sensitivity of AT-752 were assessed.

82

## 83 **RESULTS**

### 84 **Study enrollment and completion**

85 A total of 65 subjects were enrolled into one of six SAD or three MAD cohorts (see Materials  
86 and Methods). Among the SAD cohorts, 41 subjects were enrolled, and 40 subjects (97.6%)  
87 completed the trial. One subject (2.4%) randomized to receive AT-752 discontinued due to  
88 withdrawal of consent after receiving AT-752 500 mg (Cohort B), and was replaced. All 41  
89 subjects were included in the safety population, and 31 subjects (75.6%) who received at  
90 least one dose of AT-752 were included in the PK population. Among the MAD cohorts, 24  
91 subjects were enrolled and all completed the trial. All 24 subjects were included in the  
92 safety population, and 18 subjects (75.0%) who received at least one dose of AT-752 were  
93 included in the PK population.

### 94 **Patient demographics and baseline characteristics**

95 Demographics and baseline characteristics in the SAD cohorts were generally similar across  
96 cohorts and treatments (**Table 1**). The proportion of male (51.2%) and female (48.8%)  
97 subjects in the SAD cohorts were similar, whereas the majority were male (62.5%) in the

98 **Table 1. Baseline characteristics of study subjects**

| Variable                   | SAD cohorts                         |                                     |                                      |                                                |                                      |                     |                     | MAD cohorts                                         |                                                       |                                                       |                     |                      |
|----------------------------|-------------------------------------|-------------------------------------|--------------------------------------|------------------------------------------------|--------------------------------------|---------------------|---------------------|-----------------------------------------------------|-------------------------------------------------------|-------------------------------------------------------|---------------------|----------------------|
|                            | Cohort A<br>AT-752<br>250 mg<br>n=6 | Cohort B<br>AT-752<br>500 mg<br>n=7 | Cohort C<br>AT-752<br>1000 mg<br>n=6 | Cohort D<br>AT-752<br>1000 mg<br>ethnic<br>n=6 | Cohort E<br>AT-752<br>1500 mg<br>n=6 | Placebo<br>n=10     | Total<br>N=41       | Cohort F<br>AT-752<br>1000 mg QD<br>× 7 days<br>n=6 | Cohort G<br>AT-752<br>750 mg BID<br>× 4.5 days<br>n=6 | Cohort H<br>AT-752<br>750 mg TID<br>× 4.3 days<br>n=6 | Placebo<br>n=6      | Total<br>N=24        |
| Mean age, years<br>(range) | 28.2<br>(19–44)                     | 31.1<br>(16–64)                     | 28.5<br>(25–35)                      | 28.3<br>(21–43)                                | 30.8<br>(21–59)                      | 25.9<br>(20–39)     | 28.6<br>(19–64)     | 26.5<br>(20–33)                                     | 38.5<br>(20–58)                                       | 39.2<br>(21–62)                                       | 37.2<br>(18–60)     | 35.3<br>(18–62)      |
| Sex, n (%)                 |                                     |                                     |                                      |                                                |                                      |                     |                     |                                                     |                                                       |                                                       |                     |                      |
| Male                       | 3 (50.0)                            | 4 (57.1)                            | 2 (33.3)                             | 3 (50.0)                                       | 3 (50.0)                             | 6 (60.0)            | 21 (51.2)           | 6 (100.0)                                           | 3 (50.0)                                              | 4 (66.7)                                              | 2 (33.3)            | 15 (62.5)            |
| Female                     | 3 (50.0)                            | 3 (42.9)                            | 4 (66.7)                             | 3 (50.0)                                       | 3 (50.0)                             | 4 (40.0)            | 20 (48.8)           | 0                                                   | 3 (50.0)                                              | 2 (33.3)                                              | 4 (66.7)            | 9 (37.5)             |
| Race, n (%)                |                                     |                                     |                                      |                                                |                                      |                     |                     |                                                     |                                                       |                                                       |                     |                      |
| Asian                      | 3 (50.0)                            | 3 (42.9)                            | 2 (33.3)                             | 5 (83.3)                                       | 3 (50.0)                             | 4 (40.0)            | 20 (48.8)           | 0                                                   | 0                                                     | 2 (33.3)                                              | 0                   | 2 (8.3)              |
| White                      | 3 (50.0)                            | 4 (57.1)                            | 4 (66.7)                             | 0                                              | 3 (50.0)                             | 5 (50.0)            | 19 (46.3)           | 5 (83.3)                                            | 6 (100.0)                                             | 4 (66.7)                                              | 6 (100.0)           | 21 (87.5)            |
| Other                      | 0                                   | 0                                   | 0                                    | 1 (16.7)                                       | 0                                    | 1 (10.0)            | 2 (4.9)             | 1 (16.7)                                            | 0                                                     | 0                                                     | 0                   | 1 (4.2)              |
| Mean height, cm<br>(range) | 169.8<br>(159–186)                  | 170.4<br>(162–178)                  | 167.7<br>(159–181)                   | 160.3<br>(143–172)                             | 175.2<br>(163–186)                   | 169.1<br>(162–187)  | 168.8<br>(143–187)  | 183.8<br>(177–187)                                  | 174.8<br>(160–193)                                    | 173.5<br>(161–187)                                    | 166.0<br>(156–182)  | 174.5<br>(156–193)   |
| Mean weight, kg<br>(range) | 69.9<br>(51.9–79.9)                 | 64.2<br>(51.9–70.9)                 | 67.0<br>(51.9–77.8)                  | 58.6<br>(54.1–65.5)                            | 76.6<br>(59.4–94.0)                  | 67.5<br>(54.6–85.3) | 67.3<br>(51.9–94.0) | 77.5<br>(67.8–92.0)                                 | 80.2<br>(66.3–95.9)                                   | 73.2<br>(52.8–100.5)                                  | 68.0<br>(60.6–89.0) | 74.7<br>(52.8–100.5) |

99 BID, twice daily; MAD, multiple ascending dose; QD, once daily; SAD, single ascending dose; TID, three times daily.

100 MAD cohorts. Overall, subjects were predominately white except for the SAD ethnic cohort  
101 where all participants were Asian.

## 102 **Safety and tolerability of AT-752**

103 Overall, AT-752 was well tolerated in both the SAD and MAD cohorts, with no serious  
104 adverse events (SAEs) or discontinuations due to adverse events (AEs). Non-serious  
105 treatment-emergent adverse events (TEAEs) were mild or moderate in severity and resolved  
106 by the end of the study. The most frequently reported TEAEs are summarized in **Table 2**.  
107 Sporadic cases of gastrointestinal-related events, including mild-to-moderate vomiting,  
108 occurred mostly at higher doses. No treatment-related or dose-related trends in clinical  
109 laboratory values, vital sign measurements, or 12-lead electrocardiogram (ECG) parameters  
110 were observed.

## 111 **PK evaluation**

### 112 **(i) SAD cohorts**

113 Following single oral administration of AT-752 under fasting conditions, plasma  
114 concentrations of the parent prodrug AT-281 increased rapidly and were transient. AT-281  
115 was rapidly eliminated with a short plasma half-life ( $t_{1/2}$ ) of approximately 0.5 h regardless  
116 of dose, resulting in mostly unquantifiable levels 4–6 h post dose. The intermediate L-alanyl  
117 metabolite AT-551 also exhibited a transient exposure with a mean  $t_{1/2}$  of approximately 2–  
118 3 h across dose groups. The N<sup>6</sup>-methyl nucleoside metabolite, AT-229, subsequently peaked  
119 and exhibited a slower elimination phase (**Figure 2**). Plasma concentrations of AT-273  
120 (surrogate for the intracellular active triphosphate AT-9010) appeared more gradually than  
121 AT-281 and other metabolites, and exhibited a long  $t_{1/2}$  of approximately 15–25 h across  
122 doses, reflecting sustained intracellular exposure of the active metabolite AT-9010.

123

124 **Table 2. Summary of most frequent TEAEs reported by >2 subjects**

| TEAE               | SAD cohorts                         |                                     |                                             |                                      |                                                |                                      |                           |               | MAD cohorts                                         |                                                       |                                                       |                          |               | Overall<br>N=65 |
|--------------------|-------------------------------------|-------------------------------------|---------------------------------------------|--------------------------------------|------------------------------------------------|--------------------------------------|---------------------------|---------------|-----------------------------------------------------|-------------------------------------------------------|-------------------------------------------------------|--------------------------|---------------|-----------------|
|                    | Cohort A<br>AT-752<br>250 mg<br>n=6 | Cohort B<br>AT-752<br>500 mg<br>n=7 | Cohort B<br>AT-752<br>500 mg<br>fed*<br>n=7 | Cohort C<br>AT-752<br>1000 mg<br>n=6 | Cohort D<br>AT-752<br>1000 mg<br>ethnic<br>n=6 | Cohort E<br>AT-752<br>1500 mg<br>n=6 | Pooled<br>placebo<br>n=10 | Total<br>N=41 | Cohort F<br>AT-752<br>1000 mg<br>QD x 7 days<br>n=6 | Cohort G<br>AT-752<br>750 mg BID<br>x 4.5 days<br>n=6 | Cohort H<br>AT-752<br>750 mg TID<br>x 4.3 days<br>n=6 | Pooled<br>placebo<br>n=6 | Total<br>N=24 |                 |
| Headache,<br>n (%) | 0                                   | 2 (28.6)                            | 4 (57.1)                                    | 1 (16.7)                             | 0                                              | 2 (33.3)                             | 1 (10.0)                  | 8 (19.5)      | 0                                                   | 1 (16.7)                                              | 0                                                     | 1 (16.7)                 | 2 (8.3)       | 10 (15.4)       |
| Nausea,<br>n (%)   | 0                                   | 0                                   | 1 (14.3)                                    | 1 (16.7)                             | 0                                              | 1 (16.7)                             | 0                         | 3 (7.3)       | 0                                                   | 1 (16.7)                                              | 0                                                     | 1 (16.7)                 | 2 (8.3)       | 5 (7.7)         |
| Vomiting,<br>n (%) | 0                                   | 0                                   | 0                                           | 1 (16.7)                             | 0                                              | 2 (33.3)                             | 0                         | 3 (7.3)       | 0                                                   | 1 (16.7)                                              | 0                                                     | 0                        | 1 (4.2)       | 4 (6.2)         |

125 \*Food effect cohort.

126 BID, twice daily; QD, once daily; TEAE, treatment-emergent adverse event; TID, three times daily.

127



128 **Figure 2. Mean plasma concentration–time profiles of AT-281 and its metabolites AT-551,**  
129 **AT-229, and AT-273 following oral administration of single ascending doses of AT-752**

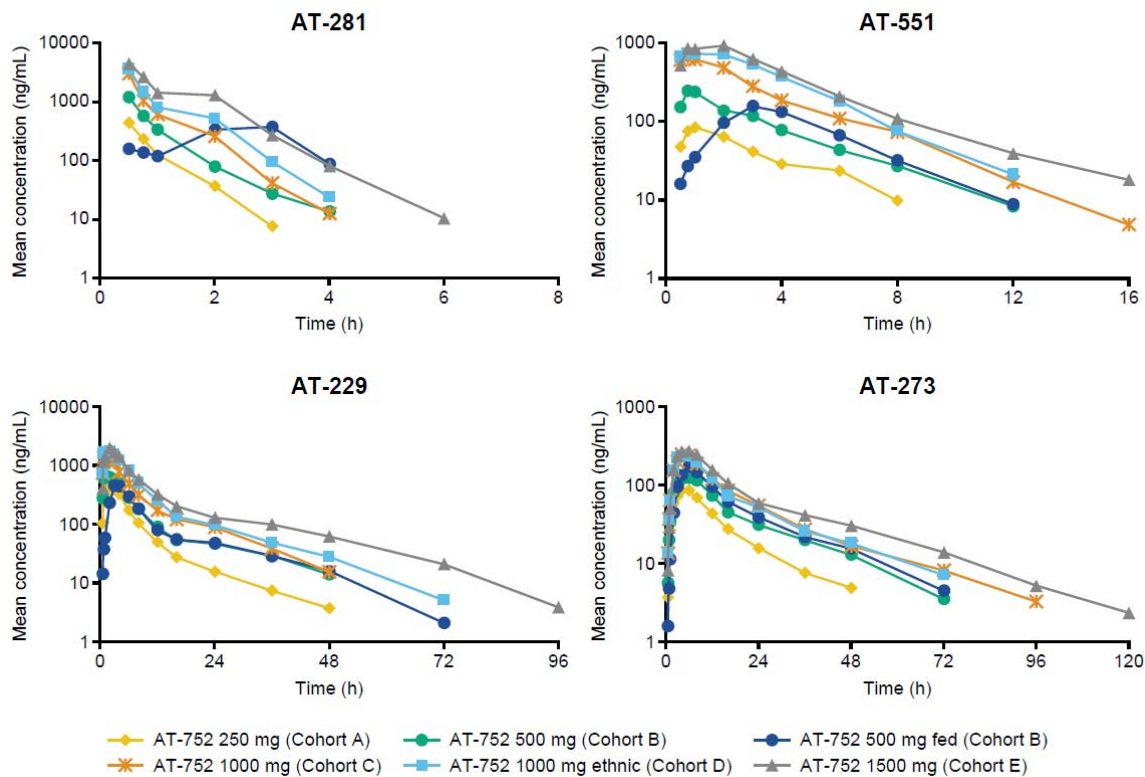

130  
131

132 **Table 3. Summary of plasma PK parameters of AT-281 and metabolites AT-551, AT-229,**  
 133 **and AT-273 following oral administration of single ascending doses of AT-752**

| Cohort                                | C <sub>max</sub><br>(ng/mL)     | T <sub>max</sub><br>(h) | AUC <sub>inf</sub><br>(ng/mL*h) | t <sub>1/2</sub><br>(h) | CL <sub>R</sub><br>(L/h) |
|---------------------------------------|---------------------------------|-------------------------|---------------------------------|-------------------------|--------------------------|
| <b>AT-281</b>                         |                                 |                         |                                 |                         |                          |
| 250 mg (Cohort A)                     | 482±131                         | 0.5 (0.5–0.8)           | 347±64.0                        | 0.5±0.1                 | 7.5±1.5                  |
| 500 mg (Cohort B)                     | 1230±1110                       | 0.5 (0.5–6.0)           | 1110±687                        | 0.5±0.1                 | 10.9±5.4                 |
| 500 mg fed (Cohort B)<br>Food effect* | 488±303<br>52.2 (22.1–123.6)    | 2.0 (0.5–3.0)           | 980±716<br>80.2 (38.7–166.2)    | 0.7±0.3                 | 6.6±1.6                  |
| 1000 mg (Cohort C)                    | 3040±960                        | 0.5 (0.5–0.6)           | 1910±508                        | 0.5±0.1                 | 11.4±1.7                 |
| 1000 mg ethnic (Cohort D)             | 3670±1260                       | 0.5 (0.5–0.5)           | 2730±944                        | 0.5±0.1                 | 9.7±4.2                  |
| 1500 mg (Cohort E)                    | 5050±2080                       | 0.5 (0.5–0.8)           | 4630±1500                       | 0.6±0.2                 | 8.3±2.2                  |
| <b>AT-551</b>                         |                                 |                         |                                 |                         |                          |
| 250 mg (Cohort A)                     | 89.2±35.6                       | 1.0 (0.8–2.0)           | 302±70.5                        | 2.1±0.3                 | 2.0±0.3                  |
| 500 mg (Cohort B)                     | 231±155                         | 1.0 (0.8–8.0)           | 898±437                         | 2.4±0.5                 | 2.1±0.6                  |
| 500 mg fed (Cohort B)<br>Food effect* | 154±83.6<br>70.5 (42.8–116.0)   | 3.1 (3.0–4.0)           | 737±289<br>78.3 (61.8–99.2)     | 2.3±0.4                 | 2.1±0.4                  |
| 1000 mg (Cohort C)                    | 695±468                         | 0.8 (0.5–2.0)           | 2330±1060                       | 2.2±0.4                 | 2.1±0.6                  |
| 1000 mg ethnic (Cohort D)             | 895±418                         | 0.9 (0.5–2.0)           | 3320±1630                       | 2.0±0.3                 | 2.1±0.6                  |
| 1500 mg (Cohort E)                    | 1080±217                        | 1.5 (0.8–2.0)           | 4100±494                        | 3.2±1.2                 | 1.9±0.4                  |
| <b>AT-229</b>                         |                                 |                         |                                 |                         |                          |
| 250 mg (Cohort A)                     | 446±121                         | 2.1 (2.0–3.0)           | 2890±680                        | 16.9±8.6                | 13.7±1.6                 |
| 500 mg (Cohort B)                     | 765±307                         | 1.0 (0.8–4.0)           | 5480±1630                       | 15.1±6.2                | 13.6±5.4                 |
| 500 mg fed (Cohort B)<br>Food effect* | 488±324<br>64.9 (43.8–96.2)     | 4.0 (3.0–6.1)           | 4310±1400<br>78.4 (68.4–89.9)   | 11.2±4.9                | 12.5±2.8                 |
| 1000 mg (Cohort C)                    | 1640±474                        | 0.9 (0.8–3.0)           | 10300±3070                      | 12.4±10.7               | 14.2±3.8                 |
| 1000 mg ethnic (Cohort D)             | 2010±489                        | 1.5 (0.8–2.0)           | 14000±4210                      | 14.7±10.1               | 13.4±2.5                 |
| 1500 mg (Cohort E)                    | 2030±600                        | 2.0 (1.0–2.0)           | 16700±3780                      | 12.5±3.8                | 15.0±2.4                 |
| <b>AT-273</b>                         |                                 |                         |                                 |                         |                          |
| 250 mg (Cohort A)                     | 90.8±18.9                       | 6.0 (3.0–6.0)           | 1440±280                        | 19.1±10.2               | 15.8±2.8                 |
| 500 mg (Cohort B)                     | 135±24.9                        | 4.0 (3.0–8.0)           | 2390±478                        | 13.9±5.9                | 16.8±7.6                 |
| 500 mg fed (Cohort B)<br>Food effect* | 175±28.8<br>132.0 (109.8–158.6) | 6.0 (6.0–8.1)           | 2990±558<br>125.6 (111.2–141.8) | 17.3±11.0               | 13.4±3.3                 |
| 1000 mg (Cohort C)                    | 241±71.1                        | 4.1 (4.0–6.3)           | 4350±1520                       | 26.2±12.2               | 17.1±6.5                 |
| 1000 mg ethnic (Cohort D)             | 240±46.2                        | 5.0 (3.1–6.0)           | 3830±519                        | 16.3±3.0                | 18.7±2.1                 |
| 1500 mg (Cohort E)                    | 283±31.6                        | 6.0 (3.2–6.1)           | 5460±1190                       | 21.7±6.2                | 19.5±4.1                 |

134 \*Food effect is represented as geometric mean ratio (90% CI).

135 C<sub>max</sub>, AUC<sub>inf</sub>, and t<sub>1/2</sub> are represented as mean ± SD. T<sub>max</sub> is represented as median (minimum–maximum). CL<sub>R</sub> is

136 represented as mean ± SD.

137 AUC<sub>inf</sub>, area under the curve extrapolated to infinity; CI, confidence interval; CL<sub>R</sub>, renal clearance; C<sub>max</sub>, maximum plasma

138 concentration; SD, standard deviation; t<sub>1/2</sub>, half-life; T<sub>max</sub>, time to reach maximum concentration.

139

140 Plasma PK parameters for the SAD cohorts are summarized in **Table 3**. Following single oral

141 administration of AT-752 at 250–1500 mg, peak concentration (C<sub>max</sub>) and extent of exposure

142 (AUC) were slightly higher numerically (with, however, largely overlapping ranges) for the

143 ethnic cohort compared with the non-ethnic cohort at the same dose level (AT-752 1000

144 mg) for AT-281, AT-551, and AT-229. For AT-273, the guanosine circulating metabolite  
145 representing the intracellular active triphosphate metabolite AT-9010,  $C_{max}$ , and AUC were  
146 similar for the ethnic cohort and the non-ethnic cohort at the same dose level. Time to peak  
147 concentration ( $T_{max}$ ) was also similar for the ethnic cohort and the non-ethnic cohort for all  
148 metabolites. The comparable PK profiles observed between the Asian and mostly Caucasian  
149 subject cohorts suggests an absence of PK ethnic sensitivity. Plasma exposure of AT-281 and  
150 its metabolites increased over the studied dose range of 250–1500 mg: AT-229 increased in  
151 a dose-proportional manner, and AT-281 and AT-551 increased in a greater than dose-  
152 proportional manner, whereas AT-273 was slightly less than dose-proportional (see Figure  
153 S1 in the Supplementary Materials). A high-fat/high-calorie meal delayed and decreased  
154 peak levels of AT-281, AT-551, and AT-229 but had limited-to-no impact on their total  
155 exposure, and slightly increased the plasma exposure of AT-273 in comparison to fasted  
156 conditions. This demonstrates that AT-752 can therefore be taken with or without food.  
157 The extent of urine elimination was low for AT-281 (up to 2.4%) and AT-551 (up to 0.7%),  
158 and moderate for AT-229 (10.7–17.9%) and AT-273 (6.7–8.8%). Total urine recovery ranged  
159 from approximately 20–30% of administered doses across cohorts, and renal clearance ( $CL_R$ )  
160 of AT-229 and AT-273 exceeded estimated glomerular filtration rate (eGFR).

#### 161 **(ii) MAD cohorts**

162 Following repeat dosing of AT-752 1000 mg once daily (QD), 750 mg twice daily (BID), and  
163 750 mg three times daily (TID), plasma AT-281 (the unchanged prodrug) did not meaningfully  
164 accumulate due to its rapid elimination (**Figure 3**). Plasma exposure of AT-273 increased by  
165 approximately 25, 60, and 80% with QD, BID, and TID, respectively, due to its long plasma  
166 half-life, reflecting rapid accumulation and sustained intracellular exposure of the active  
167 metabolite AT-9010. Steady-state plasma PK parameters are summarized in **Table 4**. Based

168 on the trough AT-273 concentrations, steady state was essentially achieved by Day 3 in all  
169 MAD cohorts (Figure 4).

170 **Figure 3. Mean (+ SD) plasma concentration–time profiles of AT-281 and metabolites AT-**  
171 **551, AT-229, and AT-273 following oral administration of multiple ascending doses of AT-**  
172 **752**

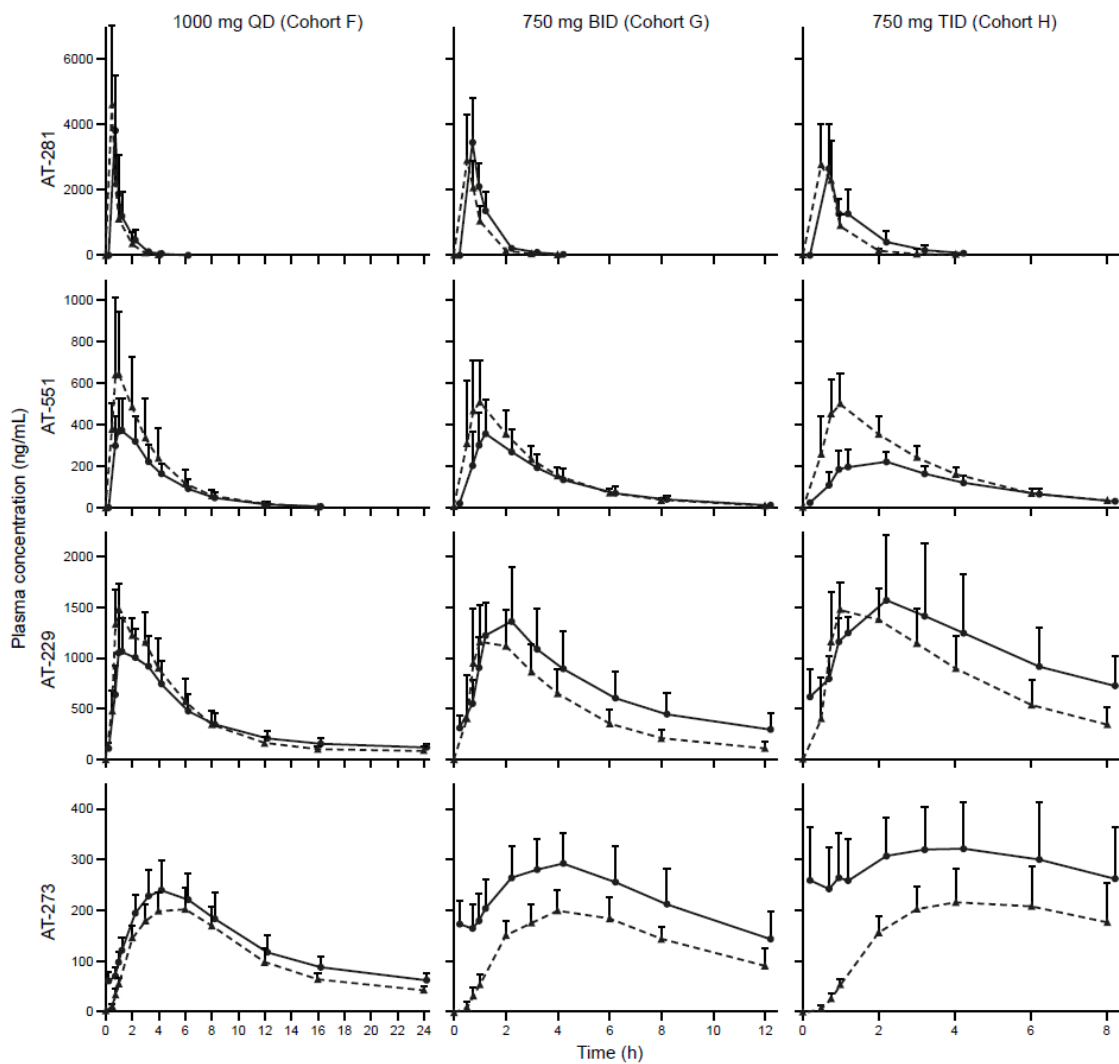

173

174 Dashed line: first dose on Day 1; solid line: last dose at steady state.

175 BID, twice daily; QD, once daily; SD, standard deviation; TID, three times daily.

176 **Table 4. Summary of steady-state plasma PK parameters of AT-281 and metabolites AT-**  
 177 **551, AT-229, and AT-273 following oral administration of multiple ascending doses of AT-**  
 178 **752**

| Cohort                | C <sub>max</sub><br>(ng/mL) | T <sub>max</sub><br>(h) | AUC <sub>tau</sub><br>(ng/mL*h) |
|-----------------------|-----------------------------|-------------------------|---------------------------------|
| <b>AT-281</b>         |                             |                         |                                 |
| 1000 mg QD (Cohort F) | 3810±1670                   | 0.5 (0.5–0.5)           | 3090±1530                       |
| 750 mg BID (Cohort G) | 3490±1280                   | 0.5 (0.5–0.8)           | 2690±640                        |
| 750 mg TID (Cohort H) | 3010±754                    | 0.5 (0.5–1.0)           | 2540±572                        |
| <b>AT-551</b>         |                             |                         |                                 |
| 1000 mg QD (Cohort F) | 392±143                     | 1.0 (0.8–2.0)           | 1650±498                        |
| 750 mg BID (Cohort G) | 365±159                     | 1.0 (0.8–2.0)           | 1330±503                        |
| 750 mg TID (Cohort H) | 245±30.2                    | 1.5 (0.8–2.0)           | 944±173                         |
| <b>AT-229</b>         |                             |                         |                                 |
| 1000 mg QD (Cohort F) | 1200±284                    | 0.9 (0.8–2.0)           | 8290±2290                       |
| 750 mg BID (Cohort G) | 1470±404                    | 1.5 (0.8–2.2)           | 7960±2970                       |
| 750 mg TID (Cohort H) | 1600±640                    | 1.5 (1.0–2.0)           | 8880±3330                       |
| <b>AT-273</b>         |                             |                         |                                 |
| 1000 mg QD (Cohort F) | 241±56.3                    | 4.0 (3.0–4.0)           | 3120±694                        |
| 750 mg BID (Cohort G) | 288±58.4                    | 3.5 (3.0–4.0)           | 2680±730                        |
| 750 mg TID (Cohort H) | 330±97.7                    | 3.5 (3.0–6.0)           | 2370±743                        |

179 C<sub>max</sub> and AUC<sub>tau</sub> represented as mean ± SD. T<sub>max</sub> is represented as median (minimum–maximum).

180 AUC<sub>tau</sub>, area under plasma concentration-time curve over the dosing interval; BID, twice daily; C<sub>max</sub>, peak concentration;

181 PK, pharmacokinetic; QD, once daily; TID, three times daily; T<sub>max</sub>, time to peak concentration.

182

183 As depicted in Figure 4, among the MAD cohorts, only AT-752 750 mg TID led to a rapid  
 184 increase in plasma AT-273 levels, with mean trough levels within the first day exceeding the  
 185 90% effective concentration (EC<sub>90</sub>) of the drug in inhibiting DENV replication *in vitro* (0.64  
 186 μM or 200 ng/mL of equivalent AT-273), and maintained these levels over the treatment  
 187 period.

188

189 **Figure 4. Mean (+ SD) plasma trough concentration–time profiles of AT-273 with following**  
190 **oral administration of multiple ascending doses of AT-752**

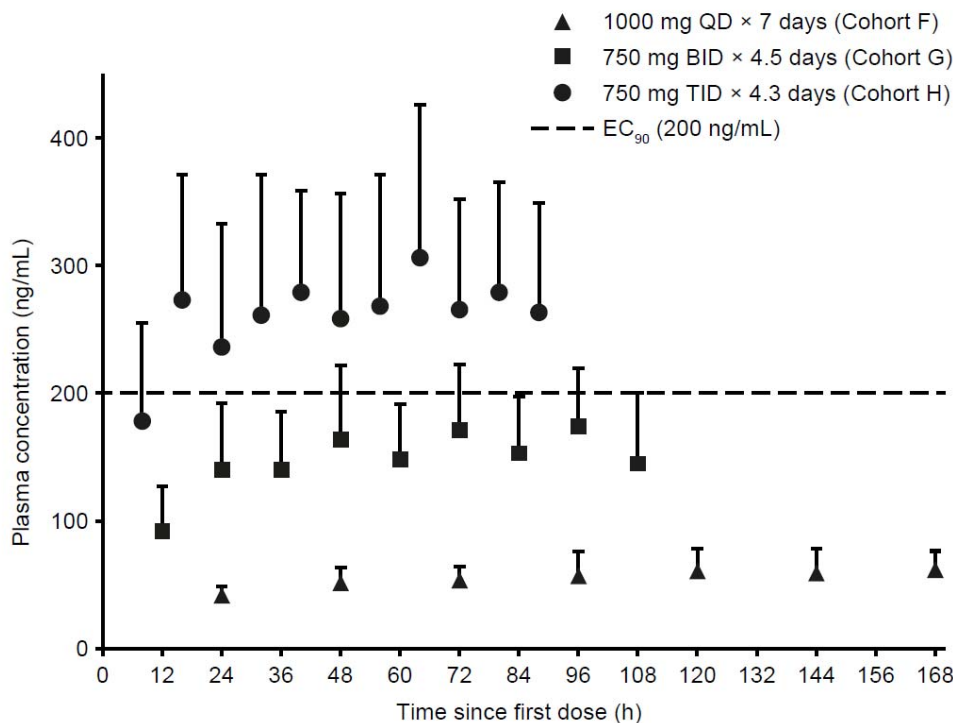

191

192 BID, twice daily; EC<sub>90</sub>, 90% effective concentration; QD, once daily; SD, standard deviation; TID, three times daily.

193

## 194 DISCUSSION

195 AT-752, when metabolized to the active triphosphate AT-9010, has been demonstrated to  
196 target the NS5 RNA-dependent RNA polymerase (RdRp) of DENV1–4 (17). NS5, the largest  
197 and most conserved nonstructural protein encoded by flaviviruses, is a promising target for  
198 antivirals, particularly nucleoside/nucleotide analogs in the treatment of dengue (5).

199 This first-in-human Phase 1 study of AT-752 evaluated the safety, tolerability, and PK of  
200 ascending single and multiple doses in healthy subjects. AT-752 demonstrated a favorable  
201 safety profile and was well tolerated in healthy subjects when administered as a single oral  
202 dose up to 1500 mg, or when administered as multiple oral doses up to 750 mg TID. No SAEs

203 were observed, and no subjects experienced AEs that lead to study drug discontinuation.

204 Most TEAEs were mild in severity, and all TEAEs resolved by the end of the study. There

205 were no clinically significant physical examination findings, vital signs, or ECGs observed.

206 In the SAD cohorts, plasma exposure of AT-281 and its metabolites was approximately dose-

207 proportional over the studied dose range of 250–1500 mg AT-752. Fed conditions led to a

208 48% reduction in  $C_{max}$  compared with fasted conditions, whereas AUC values were similar.

209 The extent of urinary elimination of AT-281 and its metabolites was low-to-moderate. Renal

210 clearance of the nucleoside metabolites AT-229 and AT-273 exceeded eGFR, suggesting

211 involvement of active secretion in their renal elimination. Furthermore, the similar PK

212 profiles observed between the ethnic and non-ethnic cohorts suggests an absence of PK

213 ethnic sensitivity in Asian participants; therefore, dose adjustment of AT-752 in this

214 population does not appear necessary. In the MAD cohorts,  $C_{max}$  of AT-281 were attained

215 approximately 0.5 h post dose (median estimates) for all dose levels. Plasma exposure of

216 AT-273 increased with increasing dose levels due to its long plasma half-life, reflecting rapid

217 accumulation and sustained intracellular exposure of the active metabolite AT-9010. AT-752

218 750 mg TID led to a rapid increase in plasma AT-273 levels, exceeding the target  $EC_{90}$  of 0.64

219  $\mu$ M, and maintained this level over the treatment period.

220 In summary, the results of this study demonstrate that AT-752 was well tolerated when

221 administered as a single dose up to 1500 mg, or when administered as multiple doses up to

222 750 mg TID. In the SAD cohorts, AT-752 exhibited no PK ethnic sensitivity in

223 South/Southeast/East Asian participants and no food effect was observed, demonstrating

224 that ethnic dose adjustment is not necessary and that AT-752 can be taken with or without

225 food. In the MAD cohorts, AT-752 TID exceeded the target antiviral level for inhibition of

226 DENV replication. The favorable safety and PK results reported here demonstrate AT-752 as

227 an attractive antiviral for the treatment of dengue, and support dose selection of AT-752 in  
228 future clinical studies.

229

## 230 **MATERIALS AND METHODS**

231 The study protocol was approved by the Human Research Ethics Committee before the trial  
232 began, and written informed consent was obtained from each subject before entering the  
233 study. This study was conducted according to the principles of the International Council for  
234 Harmonisation harmonised tripartite guideline E6(R2): Good Clinical Practice, and the  
235 ethical principles from the Declaration of Helsinki.

### 236 **Study design**

237 This was a Phase 1, first-in-human, randomized, double-blind, placebo-controlled study  
238 consisting of two sequential parts: SAD and MAD. The SAD cohorts included a food-effect  
239 cohort and both SAD and MAD cohorts evaluated the safety, tolerability, and PK of AT-752  
240 (ClinicalTrials.gov registration no. NCT04722627). All subjects were screened up to 28 days  
241 prior to the first study drug administration on Day 1, which included clinical history, physical  
242 examination, 12-lead ECG, vital signs, and laboratory tests of blood and urine.

#### 243 **(i) SAD cohorts**

244 Subjects in the SAD cohorts were assigned to one of five sequential dose cohorts (eight  
245 subjects per cohort) on Day 1 prior to the first dose. Subjects were randomized 3:1 within  
246 each cohort to receive AT-752 or a matching placebo (**Table 5**). Sentinel dosing was  
247 employed for two subjects in each SAD cohort in a ratio of 1:1 (one active, one placebo),  
248 and were dosed at least 48 h before the remainder of the cohort was dosed. All treatments  
249 were administered orally under fasting conditions, except for the food effect cohort. As part  
250 of the food effect evaluation, subjects in Cohort B (n=7) remained confined to the clinic for



251 an additional study drug administration on Day 7 under fed conditions. Subjects fasted  
252 overnight for at least 8 h and received a high-fat and high-calorie breakfast approximately  
253 30 minutes ( $\pm$  5 minutes) before study drug administration. Subjects consumed the meal  
254 within 30 minutes or less and consumed at least 75% of the meal. The high-fat  
255 (approximately 50% of total calorific content of the meal) and high-calorie (approximately  
256 800–1000 calories) breakfast, followed Food and Drug Administration (FDA) guidance  
257 recommendations and provided approximately 150, 250, and 500–600 calories from  
258 protein, carbohydrate, and fat, respectively.

259 **Table 5. SAD cohorts**

260

| Cohort            | Dose (mg) | Administration               |
|-------------------|-----------|------------------------------|
| A                 | 250       | Day 1 (fasting)              |
| B (+ food effect) | 500       | Day 1 (fasting); Day 7 (fed) |
| C                 | 1000      | Day 1 (fasting)              |
| D (Ethnic)        | 1000      | Day 1 (fasting)              |
| E                 | 1500      | Day 1 (fasting)              |

261

262

263

264 **(ii) MAD cohorts**

265 Subjects in the MAD cohorts were assigned to a repeat-dose cohort on Day 1 prior to the  
266 first dose. Subjects were randomized 3:1 to receive AT-752 or a matching placebo (**Table 6**).  
267 Sentinel dosing was employed for two subjects in each MAD cohort in a ratio of 1:1 (one  
268 active, one placebo), and were dosed at least 48 h before the remainder of the cohort was  
269 dosed. All treatments were administered orally under fasting conditions. Dose escalation to  
270 Cohort G occurred based on review of available safety data (through Day 12) and PK data  
271 (through Day 8) of Cohort F. Similarly, dose escalation to Cohort H occurred based on review  
272 of available safety data (through Day 10) and PK data (through Day 6) of Cohort G.

273

274 **Table 6. MAD cohorts**

275

| Cohort | Dose (mg) | Administration                      |
|--------|-----------|-------------------------------------|
| F      | 1000      | QD × 7 days                         |
| G      | 750       | BID × 4 days plus one dose on Day 5 |
| H      | 750       | TID × 4 days plus one dose on Day 5 |

276

277 BID, twice daily; QD, once daily; TID, three times daily.

278 **Study subjects**

279 Healthy subjects between the ages of 18 and 65 years who met the inclusion and exclusion  
280 criteria were considered eligible for this study. All subjects were required to weigh at least  
281 50 kg and have a body mass index of between 18 and 29 kg/m<sup>2</sup>, inclusive. Subjects in Cohort  
282 D (ethnic cohort) must have been of first to third generation South/Southeast/East Asian  
283 descent. Exclusion criteria included clinically relevant abnormal medical history, physical  
284 findings, ECG, or laboratory values at the pre-trial screening assessment; positive test for  
285 hepatitis B surface antigen, hepatitis C virus antibody, human immunodeficiency virus types  
286 1 or 2 antibodies, or SARS-CoV-2 at screening; or receipt of a vaccine against COVID-19 in  
287 the 14 days before the first dose. Subjects could not have used a prescription medicine,  
288 over-the-counter medicine, or herbal or dietary supplements during the 7 days before the  
289 first dose.

290 **Pharmacokinetic assessments**

291 Blood samples for plasma PK analyses were collected pre dose and 0.5, 0.75, 1, 2, 3, 4, 6, 8,  
292 12, 16, 24, 36, 48, 72, 96, and 120 h post dose for the SAD cohorts. For the food effect  
293 cohort, blood samples were also taken on Day 7 (fed state) at ≤5 minutes prior to dosing  
294 and 0.5, 0.75, 1, 2, 3, 4, 6, 8, 12, 16, 24, 36, 48, 72, 96, and 120 h post dose. For Cohort F,  
295 blood samples were collected prior to dosing and 0.5, 0.75, 1, 2, 3, 4, 6, 8, 12, and 16 h post  
296 dose on Day 1; ≤5 minutes prior to dosing and 4 h post dose on Days 2–6; ≤5 minutes prior  
297 to dosing and 0.5, 0.75, 1, 2, 3, 4, 6, 8, 12, 16, 24, 36, 48, 72, 96, and 120 h post dose on Day

298 7. For Cohort G, blood samples were collected prior to dosing and 0.5, 0.75, 1, 2, 3, 4, 6, and  
299 8 h post dose on Day 1 (AM);  $\leq 5$  minutes prior to dosing on Day 1 (PM);  $\leq 5$  minutes prior to  
300 AM and PM dosing on Days 2–4;  $\leq 5$  minutes prior to AM dosing and 0.5, 0.75, 1, 2, 3, 4, 6, 8,  
301 12, 16, 24, 36, 48, 72, 96, and 120 h post dose on Day 5. For Cohort H, blood samples were  
302 collected prior to dosing and 0.5, 0.75, 1, 2, 3, 4, and 6 h post dose on Day 1 (AM);  $\leq 5$   
303 minutes prior to PM dosing on Day 1;  $\leq 5$  minutes prior to AM and PM dosing on Days 2 and  
304 3;  $\leq 5$  minutes prior to AM dosing (Day 4);  $\leq 5$  minutes prior to PM dosing and 0.5, 0.75, 1, 2,  
305 3, 4, and 6 h post dose on Day 4 (PM);  $\leq 5$  minutes prior to AM dosing and 0.5, 0.75, 1, 2, 3,  
306 4, 6, 8, 12, 16, 24, 48, 72, 96, and 120 h post dose on Day 5. Urine samples for PK analysis  
307 were collected prior to dosing and 0–4, 4–8, 8–12,  
308 12–24, 24–48, 48–72, 72–96, and 96–120 h post dose on Day 1 for the SAD cohorts, as well  
309 as on Day 7 (fed state) for the food effect cohort. For Cohort F, urine samples were collected  
310 prior to dosing on Day 1, and a pooled sample taken over 0–24 h post dose on Day 7. The  
311 collected plasma and urine samples underwent quantitation for AT-281 and its metabolites  
312 AT-551, AT-229, and AT-273 using validated liquid chromatography/tandem mass  
313 spectrometry (LC-MS/MS) methodologies. Plasma assay ranges were 5–5000 ng/mL for AT-  
314 281 and AT-551, and 2–2000 ng/mL for AT-229 and AT-273; urine assay ranges were 5–5000  
315 ng/mL for AT-281 and AT-551, and 10–10000 ng/mL for AT-229 and AT-273.

### 316 **Statistical analysis**

317 Plasma concentration–time data were analyzed by non-compartmental approach  
318 using Phoenix<sup>®</sup> WinNonlin<sup>®</sup> Version 8.3 (Certara USA Inc., Princeton, New Jersey) or SAS<sup>®</sup>  
319 Version 9.4 (SAS Institute Inc., Cary, North Carolina), as appropriate. For the SAD cohorts,  
320 dose proportionality was assessed on Day 1 for AT-281, AT-551, AT-229, and AT-273 in the  
321 plasma using the power regression model for the AUCs and  $C_{\max}$  PK parameters (19).

322 To assess the impact of a high-fat meal on exposure to AT-281, AT-551, AT-229, and AT-273,  
323 the log transformed values of  $AUC_{inf}$  and  $C_{max}$  were analyzed in Cohort B for AT-281, AT-551,  
324 AT-229, and AT-273 using a linear mixed effect model with fed/fasted status as a fixed effect  
325 and subject as a random effect.

326 Ethnic sensitivity analysis for analyte AT-752 PK was performed by visual inspection of mean  
327 concentration vs time profiles and assessment of PK parameters in summary tables.

### 328 **Laboratory and safety assessment**

329 Safety assessments included monitoring of AEs, clinical laboratory tests (hematology, serum  
330 chemistry, urinalysis, coagulation tests, and cardiac biomarkers), vital sign measurements,  
331 12-lead ECGs, and physical examination. All AEs were coded using Medical Dictionary for  
332 Regulatory Activities (MedDRA) Version 24.1.

333

### 334 **ACKNOWLEDGEMENTS**

335 This study was funded by Atea Pharmaceuticals, Inc. Medical writing support was provided  
336 by Samantha Brick, Elements Communications Ltd, UK, and funded by Atea Pharmaceuticals,  
337 Inc.

338 Xiao-Jian Zhou, Maureen Montrond, Laura Ishak, Keith Pietropaolo, Dayle James, Bruce  
339 Belanger, Arantxa Horga, Janet Hammond are employees of and may own stock in Atea  
340 Pharmaceuticals, Inc, Boston, MA, USA; Jason Lickliter is an employee of Nucleus Network,  
341 Melbourne, Australia, which was contracted by Atea Pharmaceuticals, Inc to help perform  
342 this research.

343 **REFERENCES**

- 344 1. Murugesan A, Manoharan M. Dengue Virus. *Emerging and Reemerging Viral Pathogens*.  
345 2020:281-359. doi: 10.1016/B978-0-12-819400-3.00016-8. Epub 2019 Sep 20.
- 346 2. Ebi KL, Nealon J. 2016. Dengue in a changing climate. *Environmental Research* 151:115-  
347 123.
- 348 3. Harapan H, Michie A, Sasmono RT, Imrie A. 2020. Dengue: A Minireview. *Viruses* 12.
- 349 4. Chan CY, Ooi EE. 2015. Dengue: an update on treatment options. *Future Microbiology*  
350 10:2017-2031.
- 351 5. Obi JO, Gutiérrez-Barbosa H, Chua JV, Deredge DJ. 2021. Current Trends and Limitations  
352 in Dengue Antiviral Research. *Trop Med Infect Dis* 6.
- 353 6. Palanichamy Kala M, St John AL, Rathore APS. 2023. Dengue: Update on Clinically  
354 Relevant Therapeutic Strategies and Vaccines. *Curr Treat Options Infect Dis* 15:27-52.
- 355 7. Pintado Silva J, Fernandez-Sesma A. 2023. Challenges on the development of a dengue  
356 vaccine: a comprehensive review of the state of the art. *Journal of General Virology* 104.
- 357 8. Thomas SJ, Yoon IK. 2019. A review of Dengvaxia®: development to deployment. *Hum*  
358 *Vaccin Immunother* 15:2295-2314.
- 359 9. Angelin M, Sjölin J, Kahn F, Ljunghill Hedberg A, Rosdahl A, Skorup P, Werner S,  
360 Woxenius S, Askling HH. 2023. Qdenga® - A promising dengue fever vaccine; can it be  
361 recommended to non-immune travelers? *Travel Medicine and Infectious Disease*  
362 54:102598.
- 363 10. Shukla R, Ramasamy V, Shanmugam RK, Ahuja R, Khanna N. 2020. Antibody-Dependent  
364 Enhancement: A Challenge for Developing a Safe Dengue Vaccine. *Front Cell Infect*  
365 *Microbiol* 10:572681.

- 366 11. Nguyen NM, Tran CN, Phung LK, Duong KT, Huynh Hle A, Farrar J, Nguyen QT, Tran HT,  
367 Nguyen CV, Merson L, Hoang LT, Hibberd ML, Aw PP, Wilm A, Nagarajan N, Nguyen DT,  
368 Pham MP, Nguyen TT, Javanbakht H, Klumpp K, Hammond J, Petric R, Wolbers M,  
369 Nguyen CT, Simmons CP. 2013. A randomized, double-blind placebo controlled trial of  
370 balapiravir, a polymerase inhibitor, in adult dengue patients. *J Infect Dis* 207:1442-50.
- 371 12. Tricou V, Minh NN, Van TP, Lee SJ, Farrar J, Wills B, Tran HT, Simmons CP. 2010. A  
372 randomized controlled trial of chloroquine for the treatment of dengue in Vietnamese  
373 adults. *PLoS Negl Trop Dis* 4:e785.
- 374 13. Whitehorn J, Nguyen CVV, Khanh LP, Kien DTH, Quyen NTH, Tran NTT, Hang NT, Truong  
375 NT, Hue Tai LT, Cam Huong NT, Nhon VT, Van Tram T, Farrar J, Wolbers M, Simmons CP,  
376 Wills B. 2016. Lovastatin for the Treatment of Adult Patients With Dengue: A  
377 Randomized, Double-Blind, Placebo-Controlled Trial. *Clin Infect Dis* 62:468-476.
- 378 14. Low JG, Sung C, Wijaya L, Wei Y, Rathore APS, Watanabe S, Tan BH, Toh L, Chua LT, Hou  
379 Y, Chow A, Howe S, Chan WK, Tan KH, Chung JS, Cherng BP, Lye DC, Tambayah PA, Ng  
380 LC, Connolly J, Hibberd ML, Leo YS, Cheung YB, Ooi EE, Vasudevan SG. 2014. Efficacy and  
381 safety of celgosivir in patients with dengue fever (CELADEN): a phase 1b, randomised,  
382 double-blind, placebo-controlled, proof-of-concept trial. *Lancet Infect Dis* 14:706-715.
- 383 15. Pozo-Aguilar JO, Monroy-Martínez V, Díaz D, Barrios-Palacios J, Ramos C, Ulloa-García A,  
384 García-Pillado J, Ruiz-Ordaz BH. 2014. Evaluation of host and viral factors associated  
385 with severe dengue based on the 2009 WHO classification. *Parasites & Vectors* 7:590.
- 386 16. Good SS, Shannon A, Lin K, Moussa A, Julander JG, La Colla P, Collu G, Canard B,  
387 Sommadossi JP. 2021. Evaluation of AT-752, a Double Prodrug of a Guanosine  
388 Nucleotide Analog with In Vitro and In Vivo Activity against Dengue and Other  
389 Flaviviruses. *Antimicrob Agents Chemother* 65:e0098821.

- 390 17. Feracci M, Eydoux C, Fattorini V, Lo Bello L, Gauffre P, Selisko B, Sutto-Ortiz P, Shannon  
391 A, Xia H, Shi PY, Noel M, Debart F, Vasseur JJ, Good S, Lin K, Moussa A, Sommadossi JP,  
392 Chazot A, Alvarez K, Guillemot JC, Decroly E, Ferron F, Canard B. 2023. AT-752 targets  
393 multiple sites and activities on the Dengue virus replication enzyme NS5. *Antiviral Res*  
394 212:105574.
- 395 18. Good SS, Westover J, Jung KH, Zhou XJ, Moussa A, La Colla P, Collu G, Canard B,  
396 Sommadossi JP. 2021. AT-527, a Double Prodrug of a Guanosine Nucleotide Analog, Is a  
397 Potent Inhibitor of SARS-CoV-2 In Vitro and a Promising Oral Antiviral for Treatment of  
398 COVID-19. *Antimicrob Agents Chemother* 65.
- 399 19. Smith BP, Vandenhende FR, DeSante KA, Farid NA, Welch PA, Callaghan JT, Forgue ST.  
400 2000. Confidence interval criteria for assessment of dose proportionality. *Pharm Res*  
401 17:1278-83.
- 402

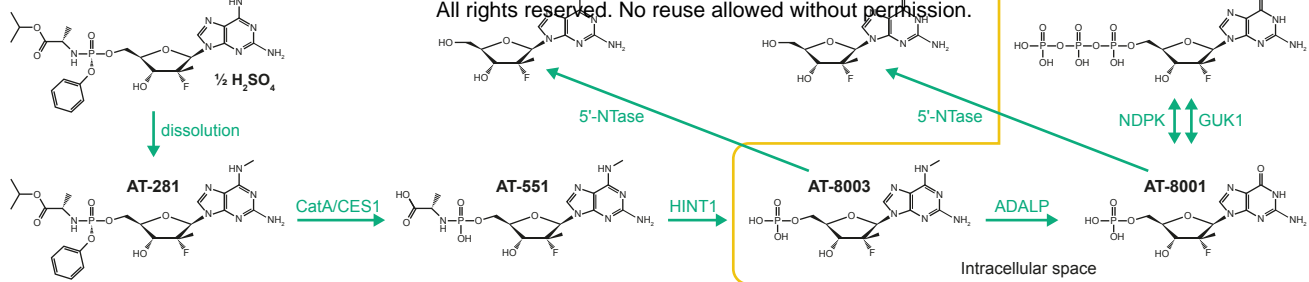



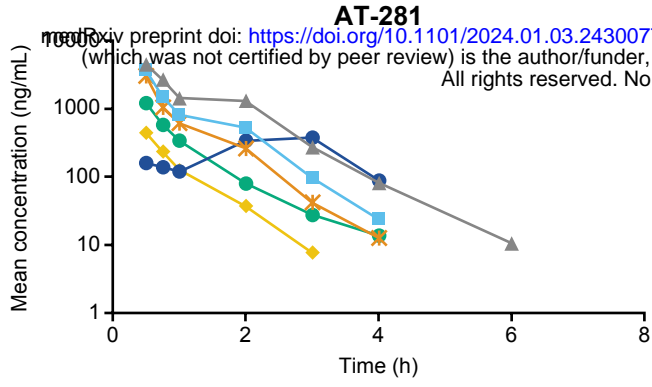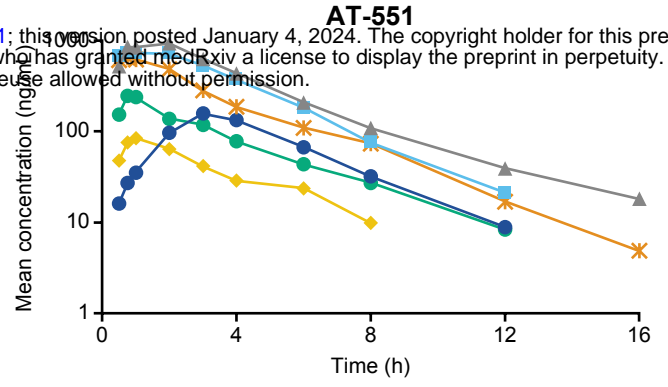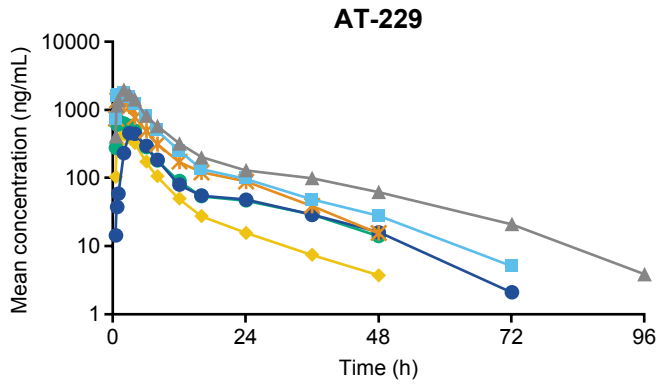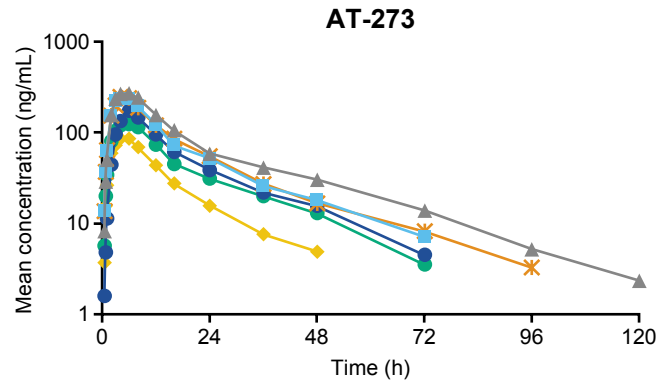

- ◆ AT-752 250 mg (Cohort A)
- AT-752 500 mg (Cohort B)
- AT-752 500 mg fed (Cohort B)
- ✱ AT-752 1000 mg (Cohort C)
- AT-752 1000 mg ethnic (Cohort D)
- ▲ AT-752 1500 mg (Cohort E)

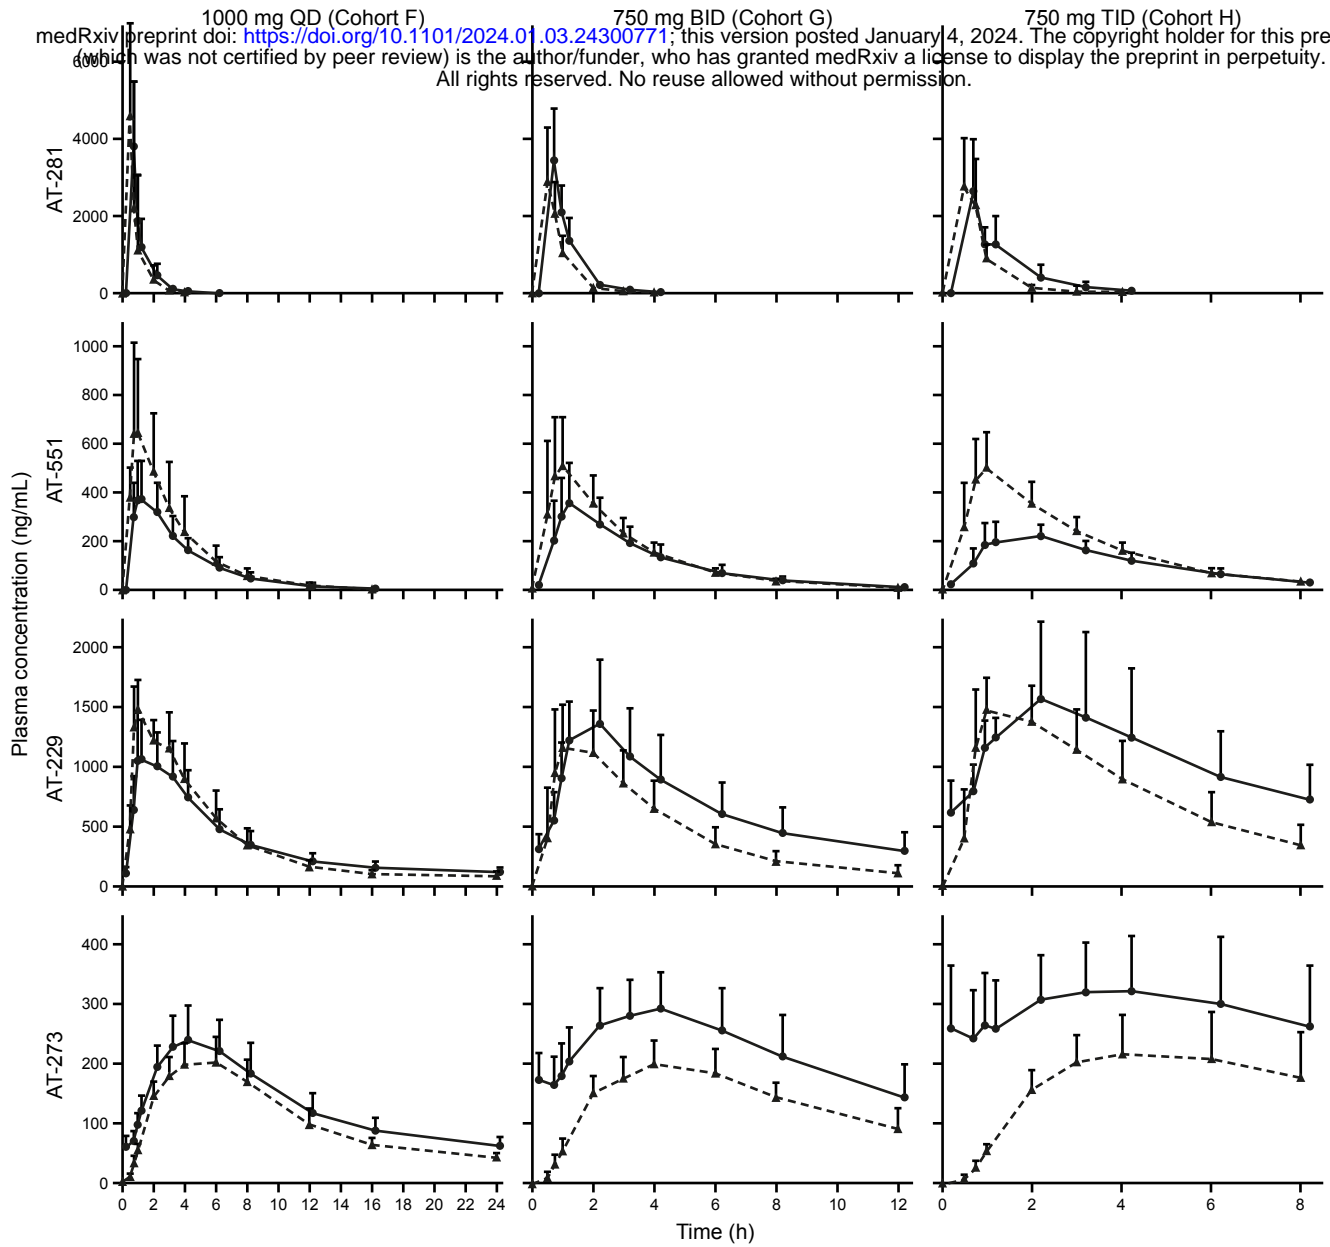

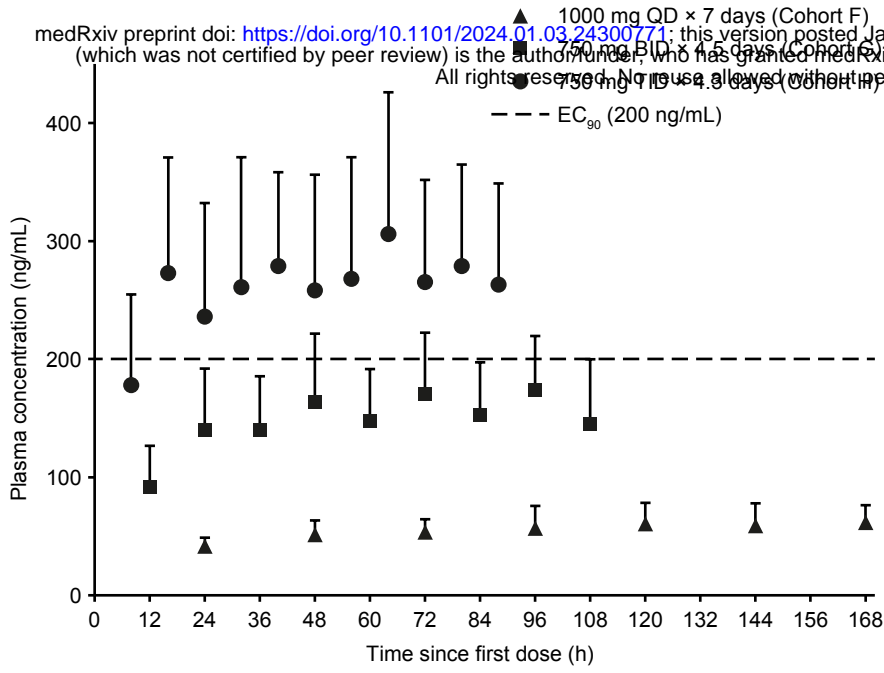

Source: https://medrxiv.org/content/10.1101/2024.01.03.24300771v1.full.pdf
